# Supplementary material
Source: PubMed Central journal article supplement (PMC2776463)
Supplement: 0910009106_0910009106SI.pdf [file 0910009106_0910009106SI.pdf]

# Supporting Information

Liu et al. 10.1073/pnas.0910009106

## SI Text

**Quantitative Real-Time PCR.** Oligonucleotides used for RT-PCR include: Human Twist: Forward: 5'- ggagtccgcagtctctacag, Reverse: 5'- cctctaccaggtcctccaga; Nanog: Forward: CA-GAAAAACCAGTGGTTGAAGACTAG, Reverse: GCAAT-GGATGCTGGGATACTC (1); Oct4: Forward: CTGTA-GGGAGGGCTTCGGGCACTT, Reverse: CTGAGGGC-CAGGCAGGAGCACGAG (2); Sox2: Forward: GGCAGCTA-CAGCATGATGCAGGAGC, Reverse: CTGGTCATGGAGT-TGTACTGCAGG (2); KLF4: Forward: TGCCAGACCAGATGCAGTCAC, Reverse: GTAGTGCCTGGTCACTC-TCATC (3); c-Myc: Forward: TGAGCCCCTAGTGCTGCAT, Reverse: AGCCCGACTCCGACCTCTT; 18s rRNA oligos (4).

**Cell Culture, Retroviral Infection, Luciferase Reporter Assay, siRNA Transfection, and 3-D Culture.** The *Twist*-specific siRNA target sequences is GGACAAGCTGAGCAAGATTCA (5, 6). The *p21<sup>CIP1</sup>* siRNA sequence is GCCTTAGTCTCAGTTTGGT-GTCTT (7). *Twist* and *p21<sup>CIP1</sup>*-specific siRNAs or control siRNAs (100 nM) were transfected by the Nucleofector technology using Nucleofector Kit V and program T-024 (Amaxa Biosystems). Transfection efficiency was monitored by non-silencing fluorescently-labeled siRNA from QIAGEN. For 3-D culture, 2,000 cells mixed with growth factor reduced Matrigel matrix (volume ratio 1:1) were seeded into a four-well chamber and photographed according to a previously described protocol (8, 9).

**Mammosphere Formation and FACS Analysis of Stem Cell Surface Markers.** Before labeling, the cells were blocked with normal mouse IgG in 1/100 dilution for 30 min and then incubated with PE labeled mouse anti-human CD24 (1/5) (clone ML5, BD PharMingen) and/or PE/Cy5 labeled rat anti human/mouse CD44 (1/200) (clone IM7, BioLegend) for 1 h. All experiments were conducted at 4 °C. Cell sorting was performed on a FACSCalibur cell sorter (BD Biosciences). The data were analyzed with FlowJo software (Tree Star, Inc.).

**Western Blot Analysis, Immunofluorescence, and Immunohistochemistry (IHC).** IHC was following conducted as described in ref. 10. Briefly, after slides were rehydrated in graded alcohol, retrieved for antigen using Citra (Biogenex) in a steamer, and blocked with peroxidase and goat serum, the slides were incubated with an antibody specific for E-cadherin (#610182, BD Biosciences), vimentin (M7020, Dako), or Twist (T6451, Sigma); all dilutions were 1:50. For the rabbit primary antibodies, slides were incubated with Envision System labeled polymer-HRP anti-rabbit secondary antibody (K4003, Dako) with TSA-plus Cyanine 5 system (NEL745001KT, Perkin-Elmer LAS). For the mouse primary antibodies, slides were stained using the M.O.M. basic kit (BMK-2202, Vector Laboratories). All slides were stored overnight at 4 °C. Peroxidase and protein blocking was performed again as described above. The slides were incubated with a cytokeratin primary antibody (Z0622, rabbit, Dako, 1/50), then stained with a polymer labeled secondary antibody (Alexa Flour 488 goat anti-rabbit, A11034, Invitrogen) and DAPI. Immunofluorescent images were taken using a PM2000 microscope (HistoRX; magnification,  $\times 60$ ). Representative images were analyzed for intensity of E-cadherin, vimentin, and Twist expression using the Image J program (NIH, Bethesda, MD), and the pixel values were averaged and graphically represented using Microsoft Excel:Mac v.x (Microsoft Corporation).

**Migration Assays.** Briefly,  $2.5 \times 10^4$  cells were seeded on an 8- $\mu$ m-pore size Transwell filter insert (Corning Inc.) coated with ECM (1:7.5) (Sigma). After 6 h of incubation at 37 °C and 5% CO<sub>2</sub>, cells adherent to the upper surface of the filter were removed using a cotton applicator. Cells were stained with 0.4% crystal violet dissolved in methanol, and the numbers of cells on the bottom were counted. Data represent at least three experiments done in triplicate (mean  $\pm$  standard error).

1. Lin T, et al. (2005) p53 induces differentiation of mouse embryonic stem cells by suppressing Nanog expression. *Nat Cell Biol* 7:165–171.
2. Chen S, et al. (2006) Self-renewal of embryonic stem cells by a small molecule. *Proc Natl Acad Sci USA* 103:17266–17271.
3. Swamynathan SK, et al. (2007) Conditional deletion of the mouse *Klf4* gene results in corneal epithelial fragility, stromal edema, and loss of conjunctival goblet cells. *Mol Cell Biol* 27:182–194.
4. Katiyar S, Jiao X, Wagner E, Lisanti MP, Pestell RG (2007) Somatic excision demonstrates c-Jun induces cellular migration and invasion through induction of stem cell factor. *Mol Cell Biol* 27:1356–1369.
5. Cheng GZ, et al. (2007) Twist transcriptionally up-regulates AKT2 in breast cancer cells leading to increased migration, invasion, and resistance to paclitaxel. *Cancer Res* 67:1979–1987.
6. Kwok WK, Ling MT, Yuen HF, Wong YC, Wang X (2007) Role of p14ARF in TWIST-mediated senescence in prostate epithelial cells. *Carcinogenesis* 28:2467–2475.
7. Aliouat-Denis CM, et al. (2005) p53-independent regulation of p21Waf1/Cip1 expression and senescence by Chk2. *Mol Cancer Res* 3:627–634.
8. Wu K, et al. (2006) DACH1 is a cell fate determination factor that inhibits Cyclin D1 and breast tumor growth. *Mol Cell Biol* 26:7116–7129.
9. Ju X, et al. (2007) Akt1 governs breast cancer progression in vivo. *Proc Natl Acad Sci USA* 104:7438–7443.
10. Hult J, et al. (2006) p27Kip1 repression of ErbB2-induced mammary tumor growth in transgenic mice involves Skp2 and Wnt/beta-catenin signaling. *Cancer Res* 66:8529–8541.

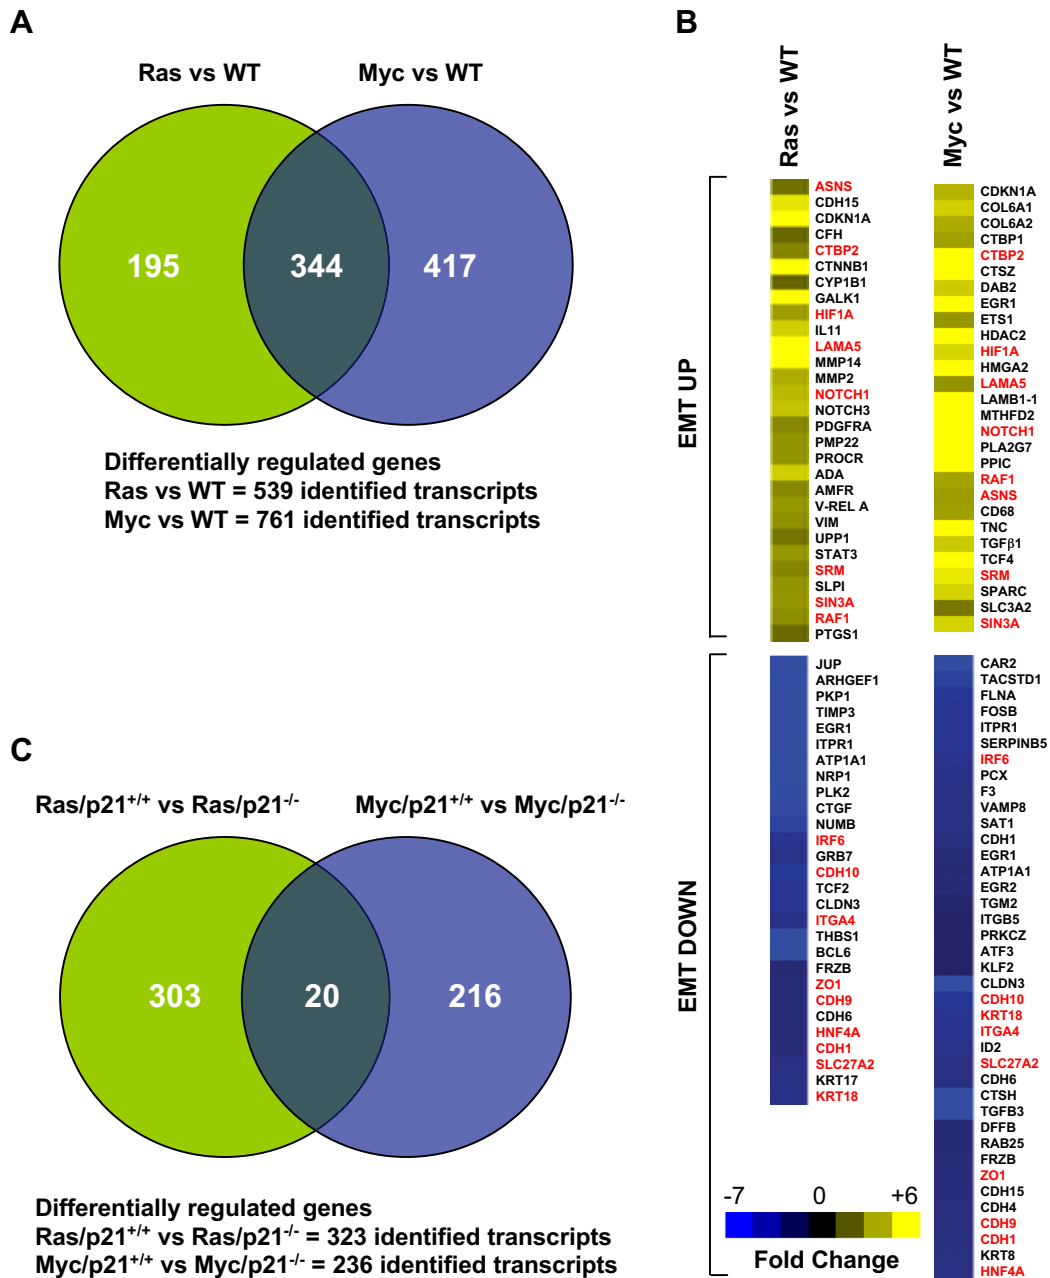

**Fig. S1.** Microarray analysis of MMTV-Ha-Ras- and MMTV-c-Myc-induced tumors. (A) Venn diagram of genes differentially regulated between MMTV-Ras and MMTV-c-Myc compared to WT mammary gland. (B) Genes differentially regulated by MMTV-Ras and MMTV-c-Myc compared to WT mammary gland that overlap with genes associated with EMT (13, 17). Genes upregulated in yellow and downregulated in blue relative to WT mammary gland ( $P < 0.05$ ). Genes represented as gray were not differentially expressed at a significance of  $P < 0.05$ . (C) Venn diagram of genes differentially regulated by p21<sup>CIP1</sup> in MMTV-Ras- and MMTV-c-Myc induced tumors. (D) Analysis of sample set enrichment scores (ASSESS) was used to classify the pathways differentially regulated by p21<sup>CIP1</sup> in MMTV-Ras and (E) MMTV-c-Myc. Sample set enrichment scores concordant across each sample were used in a hierarchical cluster with complete linkage. Red denotes positive enrichment and upregulation, blue denotes negative enrichment and down regulation. Pathways indicated in red illustrate upregulation of EMT and LTHSC in p21<sup>CIP1</sup>-/- tumors.



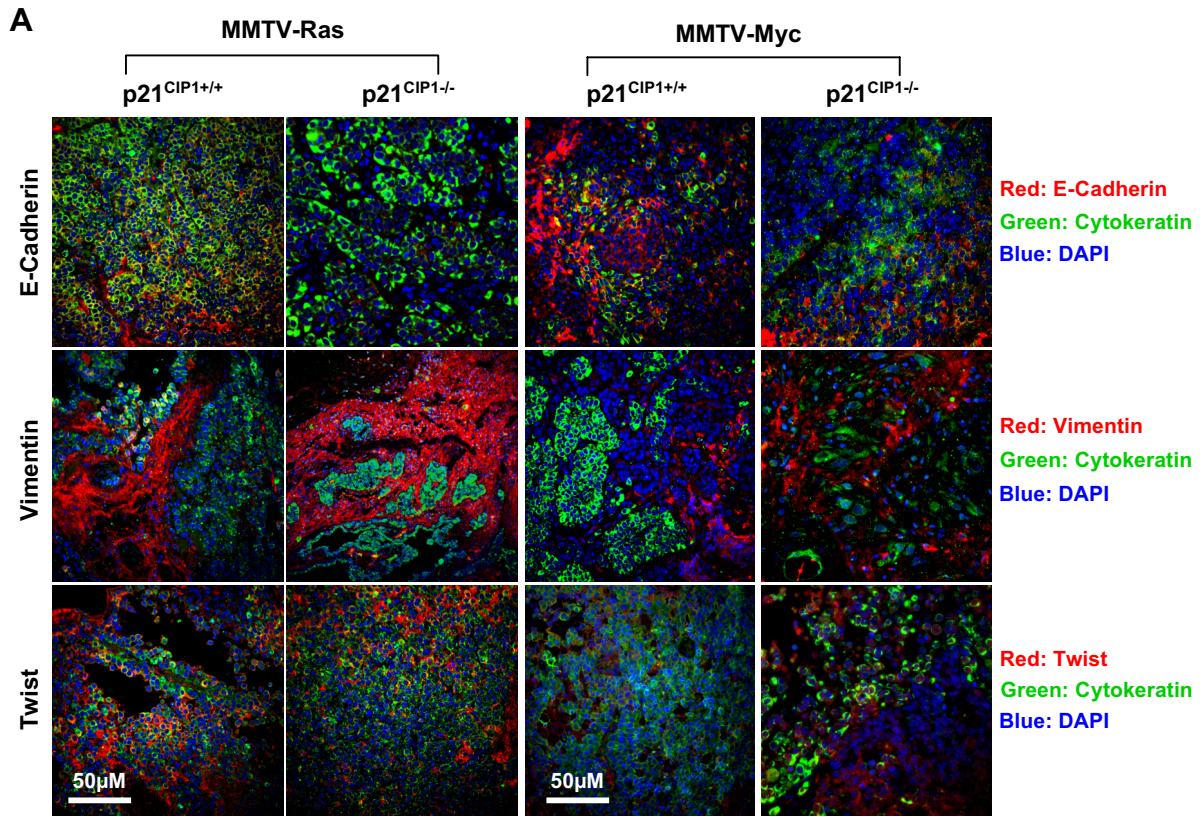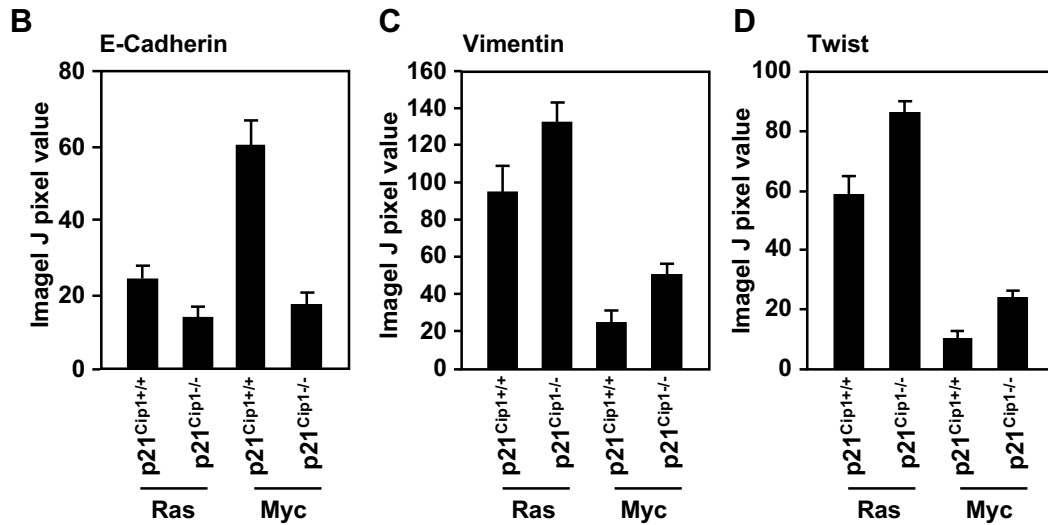

**Fig. S2.** p21<sup>CIP1</sup> suppresses EMT in MMTV-Ha-Ras and MMTV-c-Myc mice. (A) Representative immunohistochemical staining for E-cadherin (top panel), vimentin (middle panel), and Twist (bottom panel) in mammary tumors of MMTV-Ras p21<sup>CIP1+/+</sup>, MMTV-Ras/p21<sup>CIP1-/-</sup>, MMTV-c-Myc/p21<sup>CIP1+/+</sup> and MMTV-c-Myc/p21<sup>CIP1-/-</sup> mice. (B–D) Relative intensity of E-cadherin (B), vimentin (C), and Twist (D) protein abundance in murine mammary tissue showed by pixel value.

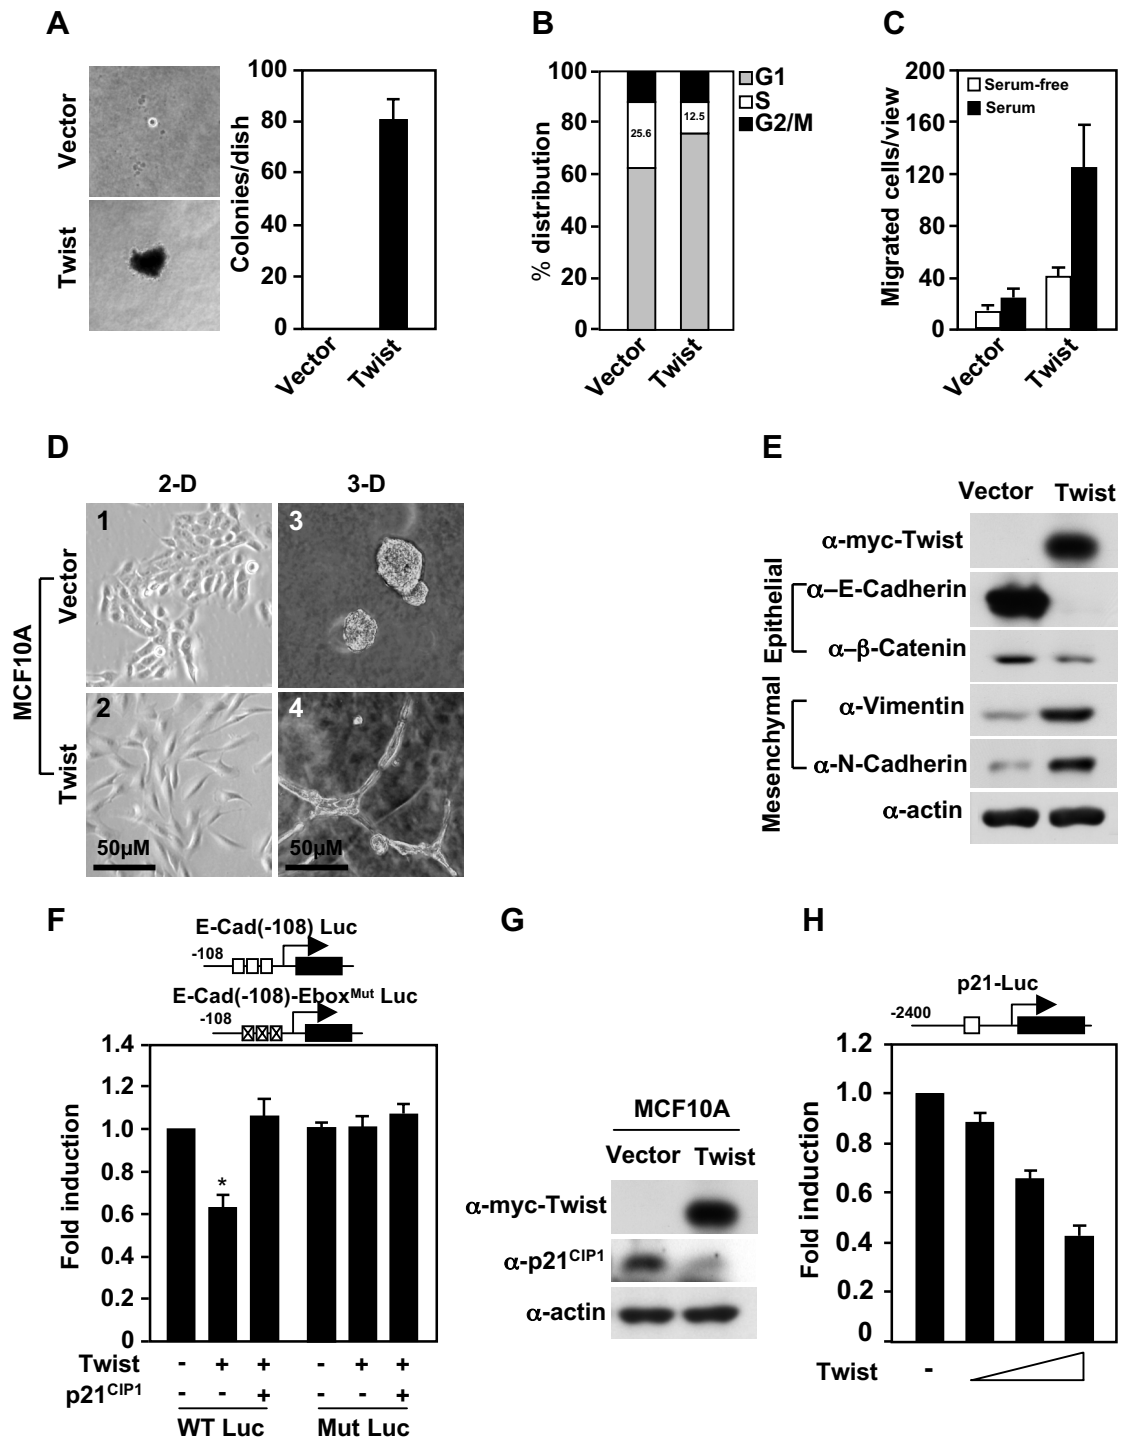

**Fig. S3.** Twist induces epithelial to mesenchymal transition in human MCF10A mammary epithelial cells. (A) Twist induces colony formation of MCF10A in soft agar. (B) Twist reduces S-phase in MCF10A cells determined by FACS assay. (C) Twist enhances migratory capability of MCF10A cell in a Transwell assay. (D) Twist induces mesenchymal morphologies in 2D culture (panels 1 and 2) and induces collagen matrix invasion in 3D culture (panels 3 and 4). (E) Expression of the epithelial markers E-cadherin,  $\beta$ -catenin, and mesenchymal markers vimentin and N-cadherin were examined by immunoblotting in MCF10A-Twist and control cells. (F) p21<sup>CIP1</sup> antagonizes Twist-mediated repression of E-cadherin promoter activity. (G and H) p21<sup>CIP1</sup> expression level (G) and promoter activity (H) was inhibited by Twist.

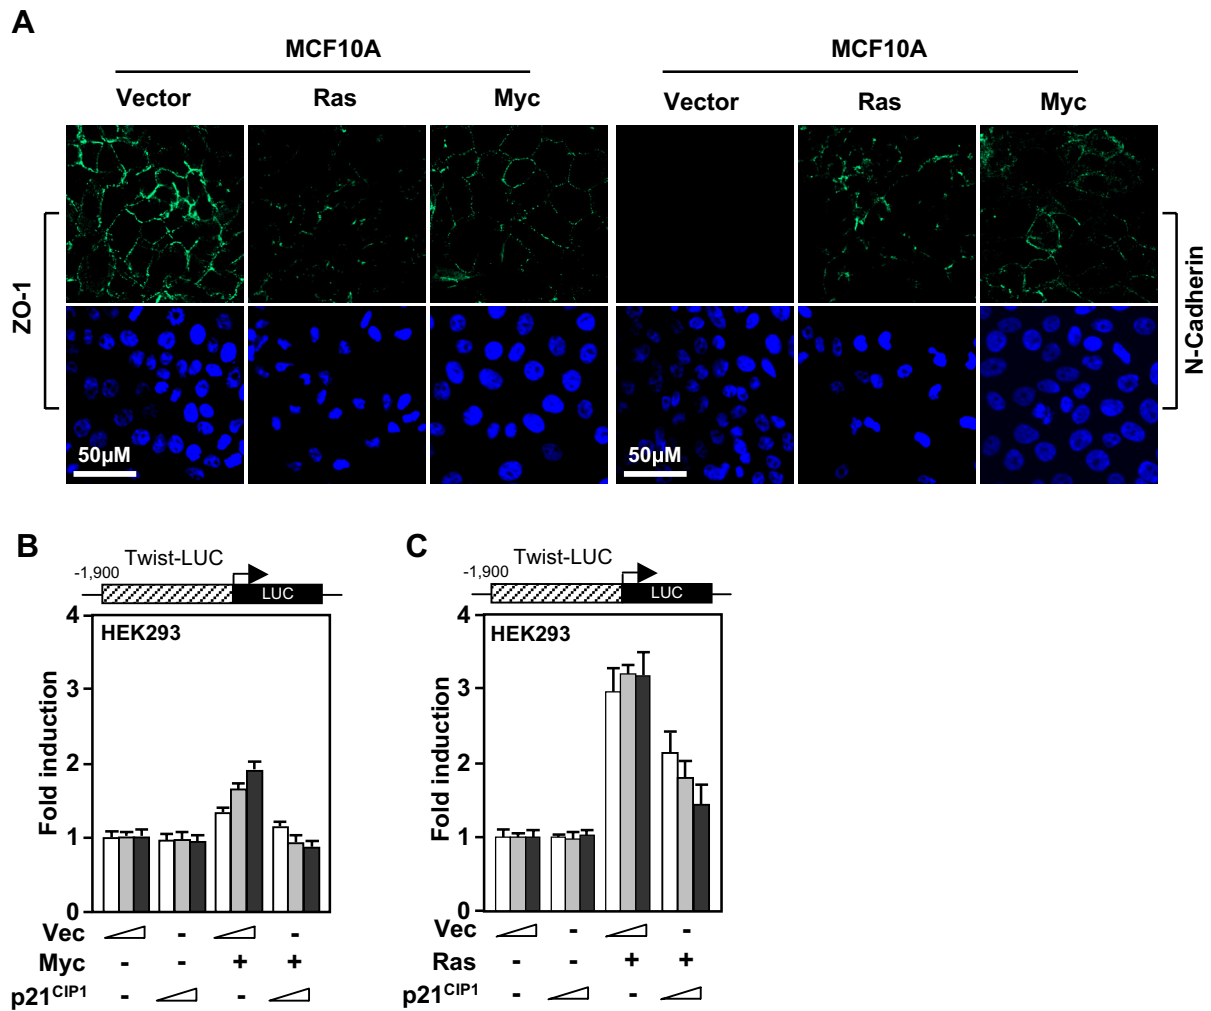

**Fig. S4.** p21<sup>CIP1</sup> inhibits Ha-Ras-mediated induction of Twist. (A) Immunofluorescence staining of epithelial marker (ZO-1) and mesenchymal marker (N-Cadherin) in MCF10A-Ras and MCF10A-c-Myc. (B and C) p21<sup>CIP1</sup> inhibits *Twist* promoter activity induced by Ras and c-Myc. All luciferase reporter assays were normalized to Renilla Luciferase and represent ± SEM ( $n \geq 3$ ).
